# Supplementary material for: Syntheses, structures, and magnetic properties of two series of copper-lanthanide heterometallic coordination polymers based on pyridine-2,3-dicarboxylic acid and succinic acid
Source: Royal Society of Chemistry journal article supplement (doi:10.1039/c6ce02353c), 2017-01-01
Supplement: c6ce02353c1.pdf [file c6ce02353c1.pdf]

**Table S1** Selected bond lengths (Å) for **1–9**

| <b>1</b> |            | <b>2</b> |            | <b>3</b> |            |
|----------|------------|----------|------------|----------|------------|
| Sm1–O4   | 2.416(3)   | Eu1–O4   | 2.400(3)   | Gd1–O4   | 2.409(3)   |
| Sm1–O5   | 2.537(3)   | Eu1–O5#1 | 2.524(3)   | Gd1–O5   | 2.536(3)   |
| Sm1–O6   | 2.472(3)   | Eu1–O6#1 | 2.458(3)   | Gd1–O6   | 2.468(3)   |
| Sm1–O7#1 | 2.444(3)   | Eu1–O7   | 2.428(3)   | Gd1–O7   | 2.599(3)   |
| Sm1–O7#2 | 2.602(3)   | Eu1–O7#2 | 2.590(3)   | Gd1–O7#1 | 2.442(3)   |
| Sm1–O8#2 | 2.513(4)   | Eu1–O8#2 | 2.500(3)   | Gd1–O8   | 2.513(3)   |
| Sm1–O1W  | 2.465(4)   | Eu1–O1W  | 2.458(3)   | Gd1–O1W  | 2.474(3)   |
| Sm1–O2W  | 2.450(4)   | Eu1–O2W  | 2.418(3)   | Gd1–O2W  | 2.429(3)   |
| Sm1–O3W  | 2.440(4)   | Eu1–O3W  | 2.416(3)   | Gd1–O3W  | 2.436(3)   |
| Cu1–O1   | 1.946(3)   | Cu1–O1   | 1.939(3)   | Cu1–O1   | 1.942(3)   |
| Cu1–O1#3 | 1.946(3)   | Cu1–O1#3 | 1.939(3)   | Cu1–O1#2 | 1.942(3)   |
| Cu1–O3#1 | 2.6123(42) | Cu1–O3#4 | 2.6075(37) | Cu1–O3#4 | 2.6084(37) |
| Cu1–O3#5 | 2.6123(42) | Cu1–O3#5 | 2.6075(37) | Cu1–O3#5 | 2.6084(37) |
| Cu1–N1   | 1.969(4)   | Cu1–N1   | 1.972(4)   | Cu1–N1   | 1.972(4)   |
| Cu1–N1#3 | 1.969(4)   | Cu1–N1#3 | 1.972(4)   | Cu1–N1#2 | 1.972(4)   |
| <b>4</b> |            | <b>5</b> |            | <b>6</b> |            |
| Tb1–O4   | 2.380(2)   | Dy1–O4   | 2.375(2)   | Er1–O4   | 2.361(2)   |
| Tb1–O5   | 2.509(2)   | Dy1–O5   | 2.498(2)   | Er1–O5#2 | 2.489(2)   |
| Tb1–O6   | 2.428(2)   | Dy1–O6   | 2.414(2)   | Er1–O6#2 | 2.389(2)   |
| Tb1–O7   | 2.398(2)   | Dy1–O7   | 2.385(2)   | Er1–O7   | 2.591(2)   |
| Tb1–O7#1 | 2.590(2)   | Dy1–O7#1 | 2.583(2)   | Er1–O7#1 | 2.364(2)   |
| Tb1–O8   | 2.468(2)   | Dy1–O8   | 2.451(2)   | Er1–O8   | 2.429(2)   |
| Tb1–O1W  | 2.421(3)   | Dy1–O1W  | 2.404(2)   | Er1–O1W  | 2.380(2)   |
| Tb1–O2W  | 2.386(3)   | Dy1–O2W  | 2.369(2)   | Er1–O2W  | 2.347(2)   |
| Tb1–O3W  | 2.393(3)   | Dy1–O3W  | 2.370(2)   | Er1–O3W  | 2.346(2)   |
| Cu1–O1   | 1.940(2)   | Cu1–O1   | 1.939(2)   | Cu1–O1   | 1.940(2)   |
| Cu1–O1#2 | 1.940(2)   | Cu1–O1#2 | 1.939(2)   | Cu1–O1#3 | 1.940(2)   |
| Cu1–O3#4 | 2.6197(26) | Cu1–O3#4 | 2.6235(25) | Cu1–O3#4 | 2.6322(26) |
| Cu1–O3#5 | 2.6197(26) | Cu1–O3#5 | 2.6235(25) | Cu1–O3#5 | 2.6322(26) |
| Cu1–N1   | 1.963(3)   | Cu1–N1   | 1.962(3)   | Cu1–N1   | 1.965(3)   |
| Cu1–N1#2 | 1.963(3)   | Cu1–N1#2 | 1.962(3)   | Cu1–N1#3 | 1.965(3)   |
| <b>7</b> |            | <b>8</b> |            | <b>9</b> |            |
| Er1–O2   | 2.274(2)   | Yb1–O2   | 2.253(3)   | Lu1–O2   | 2.244(2)   |
| Er1–O4   | 2.234(3)   | Yb1–O4   | 2.209(3)   | Lu1–O4   | 2.201(2)   |
| Er1–O5   | 2.289(3)   | Yb1–O5   | 2.528(3)   | Lu1–O5   | 2.519(2)   |
| Er1–O5#1 | 2.531(3)   | Yb1–O5#1 | 2.272(3)   | Lu1–O5#1 | 2.267(2)   |
| Er1–O6   | 2.363(3)   | Yb1–O6   | 2.339(3)   | Lu1–O6   | 2.329(3)   |
| Er1–O7   | 2.359(3)   | Yb1–O7   | 2.346(4)   | Lu1–O7   | 2.336(3)   |
| Er1–O8   | 2.377(3)   | Yb1–O8   | 2.356(3)   | Lu1–O8   | 2.339(2)   |
| Er1–O1W  | 2.361(3)   | Yb1–O1W  | 2.346(3)   | Lu1–O1W  | 2.323(2)   |
| Cu1–O1   | 1.944(2)   | Cu1–O1   | 1.948(3)   | Cu1–O1   | 1.943(2)   |
| Cu1–O1#2 | 1.944(2)   | Cu1–O1#2 | 1.948(3)   | Cu1–O1#2 | 1.943(2)   |

|          |            |          |            |          |            |
|----------|------------|----------|------------|----------|------------|
| Cu1–O3#3 | 2.5815(26) | Cu1–O3#3 | 2.5887(38) | Cu1–O3#3 | 2.5913(26) |
| Cu1–O3#5 | 2.5815(26) | Cu1–O3#5 | 2.5887(38) | Cu1–O3#5 | 2.5913(26) |
| Cu1–N1   | 1.964(3)   | Cu1–N1   | 1.962(3)   | Cu1–N1   | 1.963(3)   |
| Cu1–N1#2 | 1.964(3)   | Cu1–N1#2 | 1.962(3)   | Cu1–N1#2 | 1.963(3)   |

Symmetry codes: for **1**: #1  $x + 1, y, z$ ; #2  $-x - 2, -y + 1, -z$ ; #3  $-x, -y + 2, -z + 1$ ; #5  $-1 - x, 2 - y, 1 - z$ . For **2**: #1  $x - 1, y, z$ ; #2  $-x - 2, -y, -z$ ; #3  $-x - 1, -y + 1, -z + 1$ ; #4  $x + 1, y, z$ ; #5  $-2 - x, 1 - y, 1 - z$ . For **3**: #1  $-x, -y + 1, -z + 1$ ; #2  $-x - 1, -y, -z$ ; #4  $-1 + x, y, z$ ; #5  $-x, -y, -z$ . For **4**: #1  $-x + 1, -y + 1, -z + 2$ ; #2  $-x, -y, -z + 1$ ; #4  $-1 + x, y, z$ ; #5  $1 - x, -y, 1 - z$ . For **5**: #1  $-x + 2, -y + 1, -z + 1$ ; #2  $-x + 1, -y, -z$ ; #4  $x - 1, y, z$ ; #5  $2 - x, -y, -z$ . For **6**: #1  $-x - 1, -y + 1, -z$ ; #2  $-x - 2, -y + 1, -z$ ; #3  $-x, -y + 2, -z + 1$ ; #4  $1 + x, y, z$ ; #5  $-1 - x, 2 - y, 1 - z$ . For **7**: #1  $-x - 1, -y + 1, -z$ ; #2  $-x, -y + 2, -z + 1$ ; #3  $x + 1, y, z$ ; #5  $-1 - x, 2 - y, 1 - z$ . For **8**: #1  $-x + 1, -y + 2, -z + 1$ ; #2  $-x, -y + 1, -z$ ; #3  $x - 1, y, z$ ; #5  $1 - x, 1 - y, -z$ . For **9**: #1  $-x + 3, -y + 2, -z + 1$ ; #2  $-x + 2, -y + 1, -z$ ; #3  $x - 1, y, z$ ; #5  $3 - x, 1 - y, -z$ .

**Table S2** Coordination geometries of the metal ions in **6** and **7**

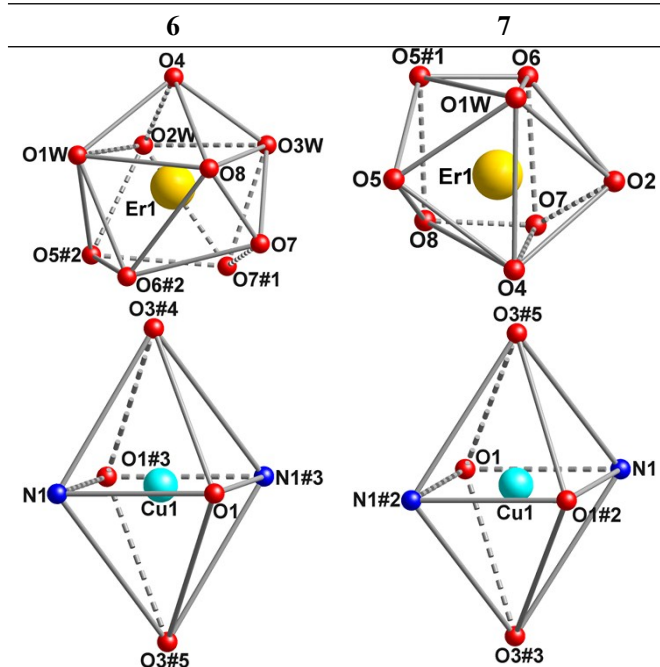

**Table S3** Hydrogen-bonding geometries ( $\text{\AA}$ ,  $^\circ$ ) of **6** and **7**

|          | D–H $\cdots$ A       | D–H        | H $\cdots$ A | D $\cdots$ A | D–H $\cdots$ A |
|----------|----------------------|------------|--------------|--------------|----------------|
| <b>6</b> | O2W–H2WB $\cdots$ O5 | 0.8504(20) | 1.9241(19)   | 2.7595(27)   | 167.048(140)   |
| <b>7</b> | C3–H3A $\cdots$ O7   | 0.9294(44) | 2.5022(35)   | 3.3818(57)   | 158.004(256)   |

**Table S4** Coordination modes of the 2,3-pydc and suc anions in **6** and **7**

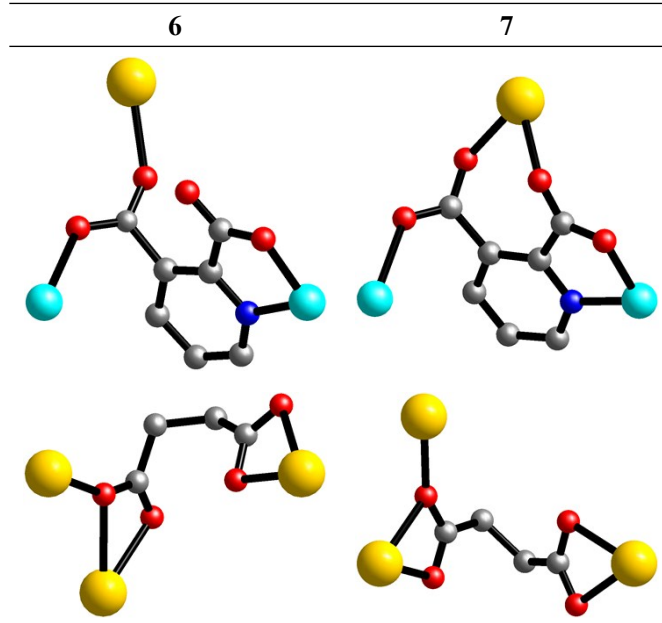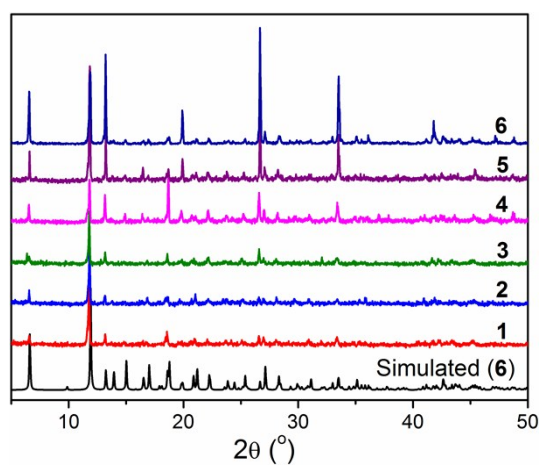

**Fig. S1** Simulated PXRD pattern of **6** and as-synthesized PXRD patterns of **1–6**.

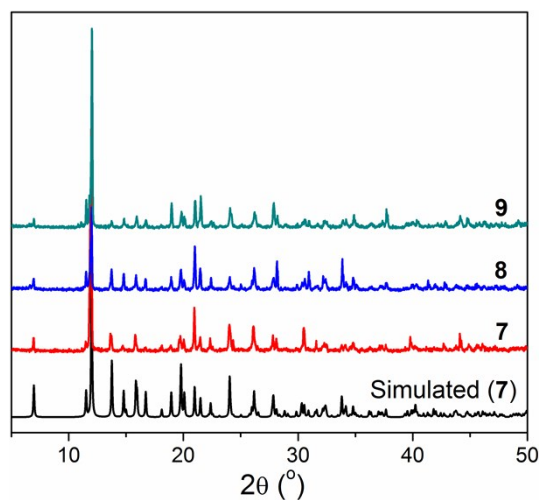

**Fig. S2** Simulated PXRD pattern of **7** and as-synthesized PXRD patterns of **7–9**.

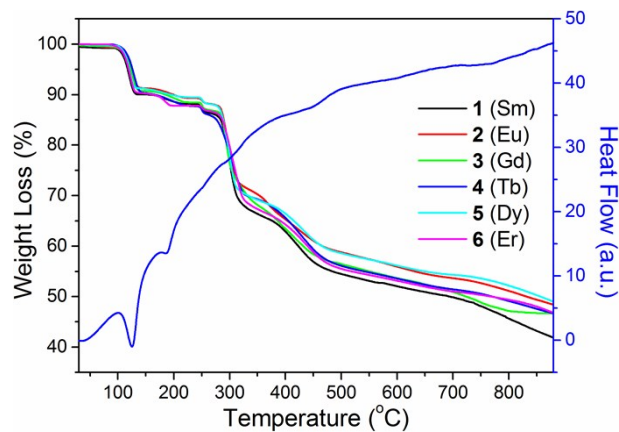

**Fig. S3** TG curves of 1–6 and DTA curve of 6.

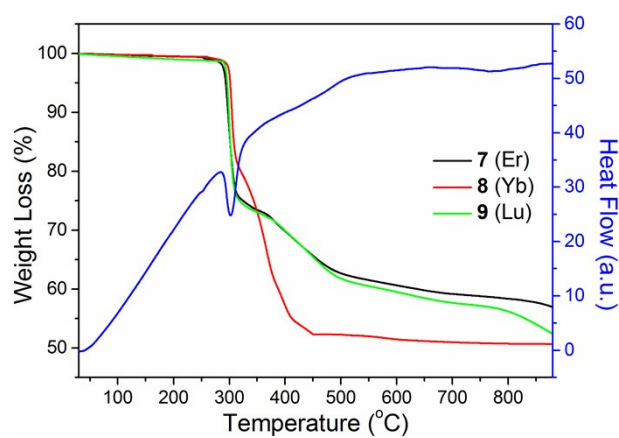

**Fig. S4** TG curves of 7–9 and DTA curve of 7.

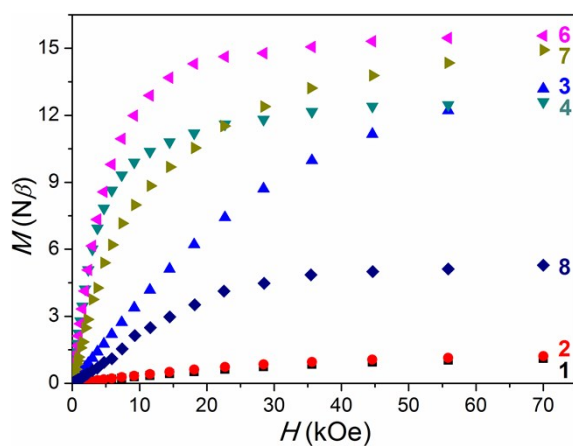

**Fig. S5** Plots of  $M$  versus  $H$  for 1–4 and 6–8 at 2 K.

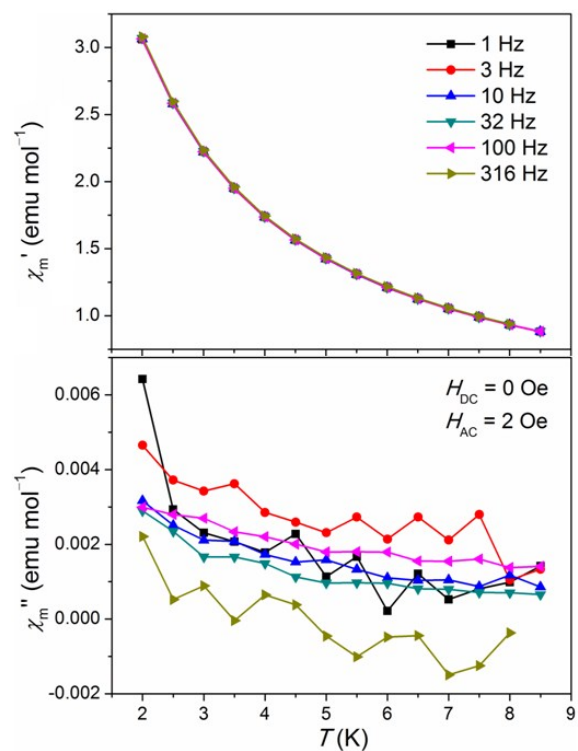

**Fig. S6** Temperature dependence of the in-phase ( $\chi'$ ) and out-of-phase ( $\chi''$ ) AC susceptibility for **5** under a 0 Oe DC field at different frequencies. Solid lines are guides to the eye.
